# Supplementary material for: 間質性肺炎を合併した慢性関節リウマチにおけるSoluble IL-2 Receptorの検討
Source: Royal Society of Chemistry journal article supplement (doi:10.1039/d1an00784j), 1992-03-30
Supplement: d1an00784j1.pdf [file d1an00784j1.pdf]

Electronic Supplementary Information (ESI) for Analyst

*This journal is © The Royal Society of Chemistry 2021*

## Electronic Supplementary Information

Large-scale investigation of single cell activities and response dynamics  
in a microarray chip with microfluidics-fabricated microporous  
membrane

Kai Han,<sup>a</sup> Meilin Sun,<sup>a</sup> Jinwei Zhang,<sup>a</sup> Wenzhu Fu,<sup>a</sup> Rui Hu,<sup>a</sup> Dan Liu<sup>a</sup> and Wenming Liu<sup>\*a</sup>

*<sup>a</sup>Departments of Biomedical Engineering and Pathology, School of Basic Medical Science,  
Central South University, Changsha, Hunan 410013, China. E-mail:  
liuwenming0229@csu.edu.cn*

**Abstract.** This supplementary information provides all the additional information as mentioned  
in the text.

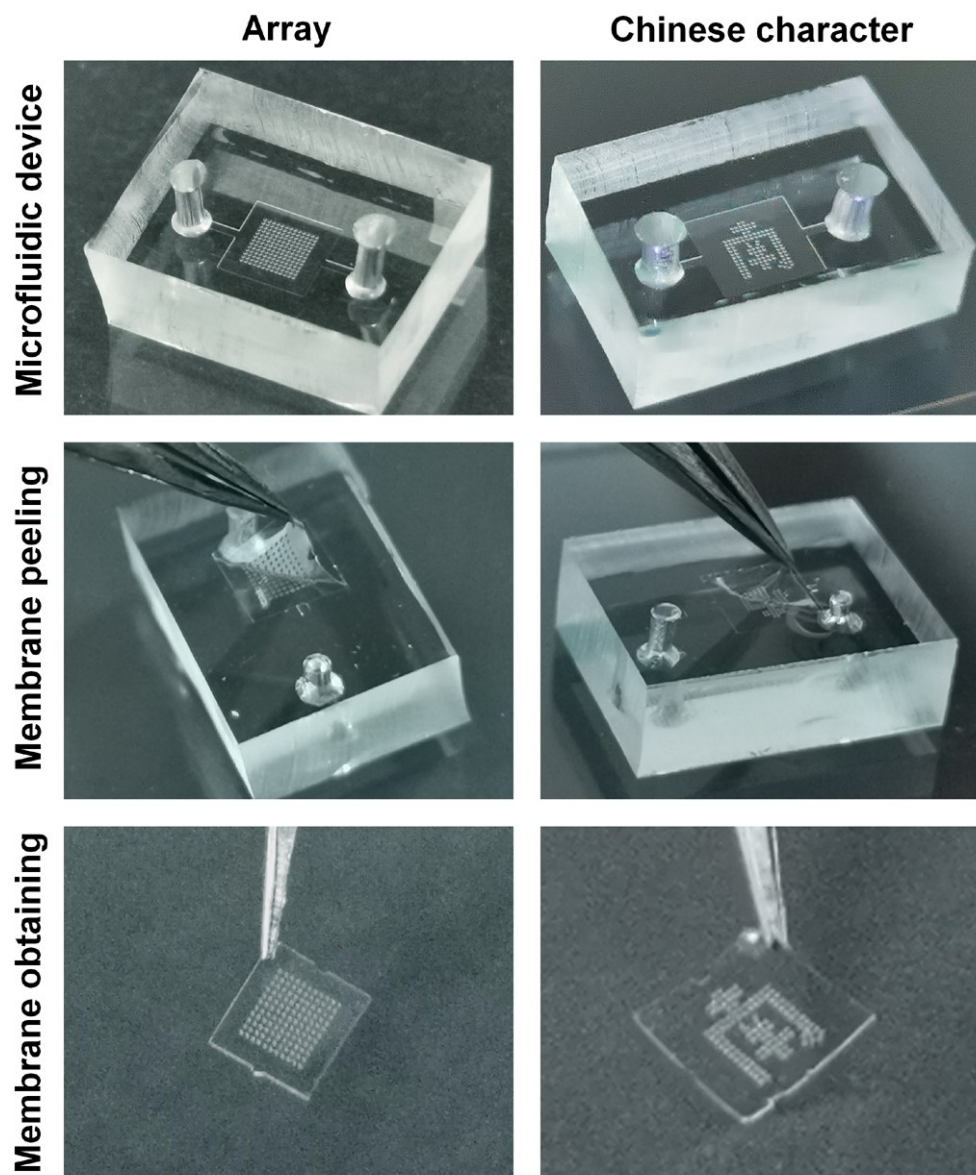

**Fig. S1** Optical images of actual microfluidic devices (top), membrane peeling from the the fluidic layer of the device (middle), and membrane obtaining (bottom) for the fabrication of PDMS microporous membranes with different arrangements (left: array; right: chinese character) of through-holes using a PDMS mixture with 8 : 1 mixing ratio.

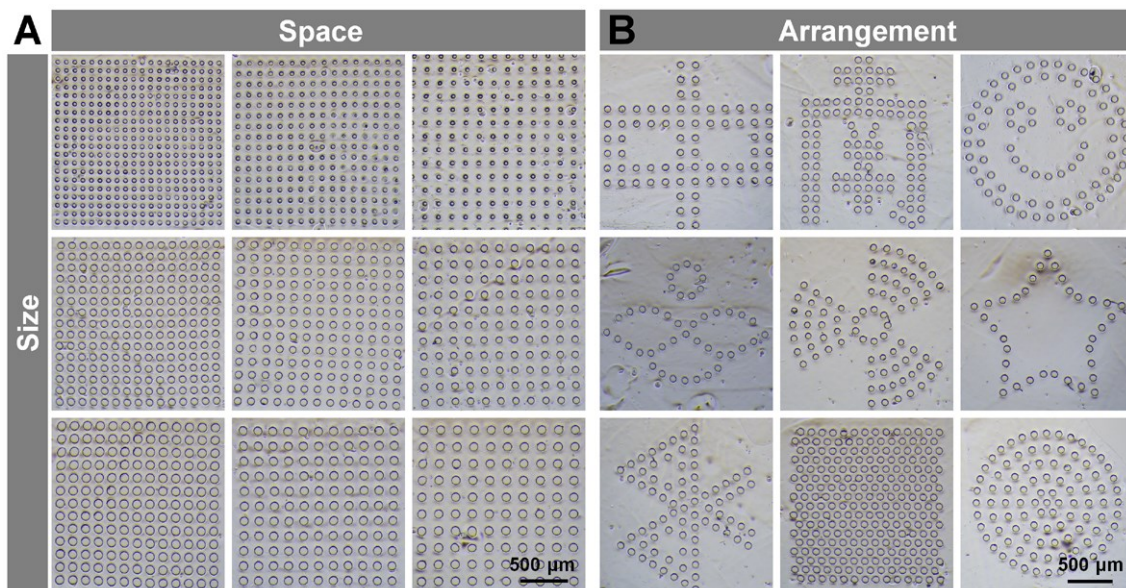

**Fig. S2** Optical imaging of actual PDMS microporous membranes. (A) Optical images of membranes with various hole sizes (diameter from top to bottom: 35, 75, and 100  $\mu\text{m}$ ) and spaces (from left to right: 50, 75, and 100  $\mu\text{m}$ ). (B) Optical images of microporous membranes with different through-hole arrangements (i.e., chinese character “zhong”, chinese character “nan”, smiling face, flower, fan, five-pointed star, bluetooth, honeycomb, and circle).

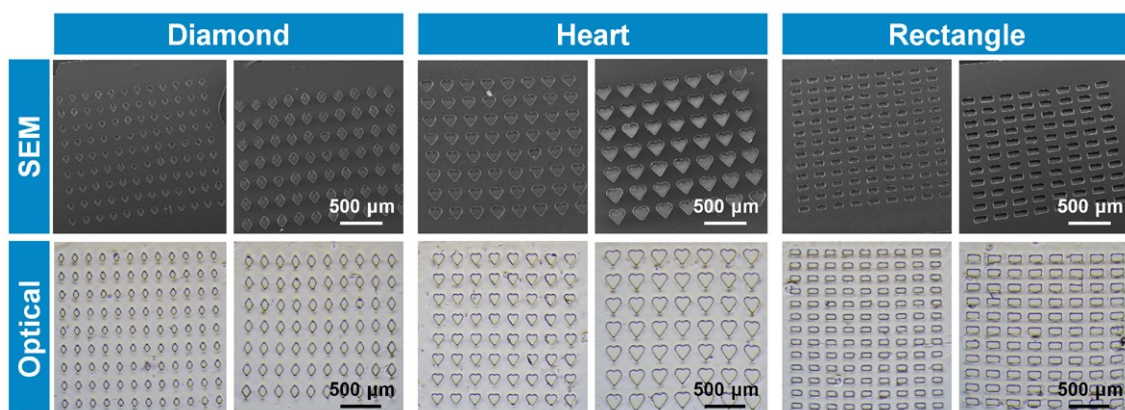

**Fig. S3** SEM (top) and Optical (bottom) images of membranes with various hole shapes and sizes.



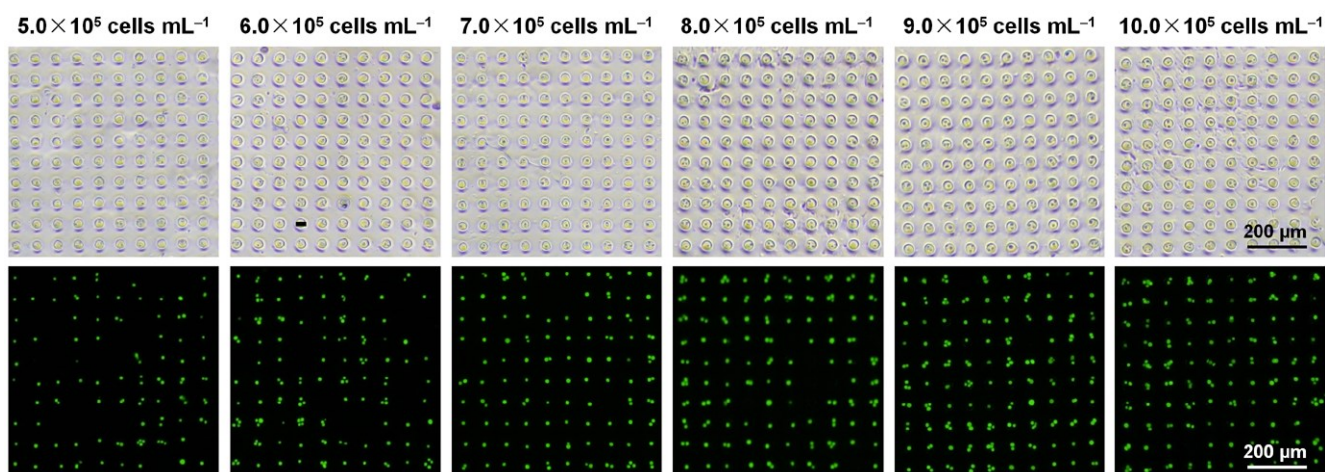

**Fig. S4** Optical and fluorescent images of cell trapping in chips using different seeding densities ( $5.0$  to  $10.0 \times 10^5$  cells  $\text{mL}^{-1}$ ).

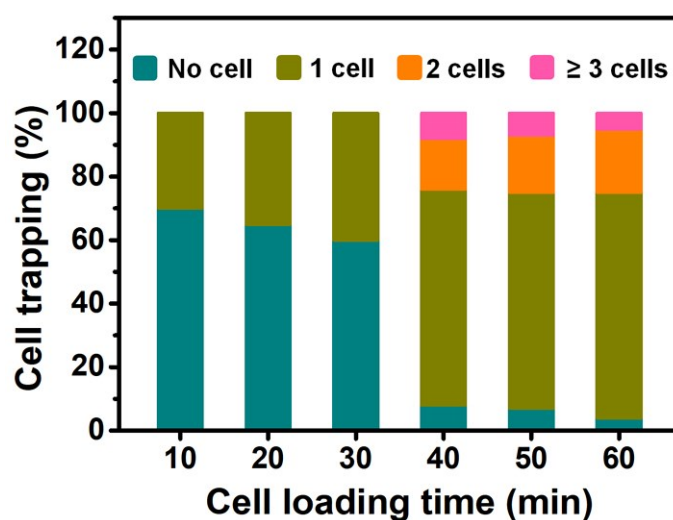

**Fig. S5** Quantification of cell trapping with different periods of loading time (10 to 60 min) in chips. Four types of cell trapping states, namely, no cell, 1 cell, 2 cells, and  $\geq 3$  cells were included.

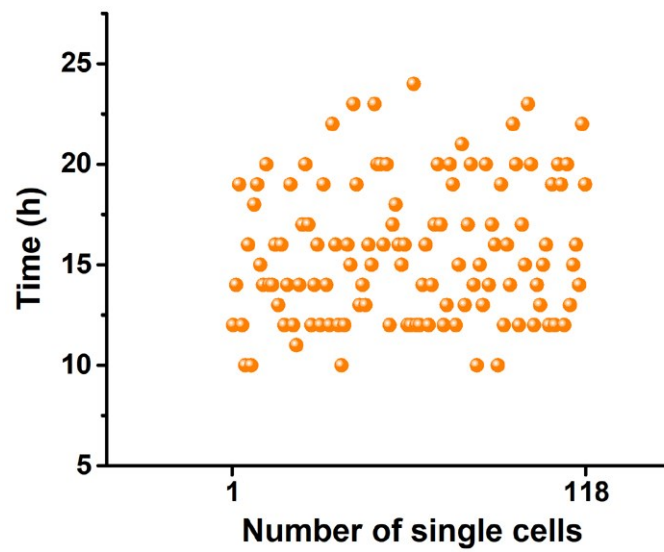

**Fig. S6** Time of the first cell division of single cells (n=118) after the trapping in chips. The start time point of the first cell division for these mother cells was uncertain.

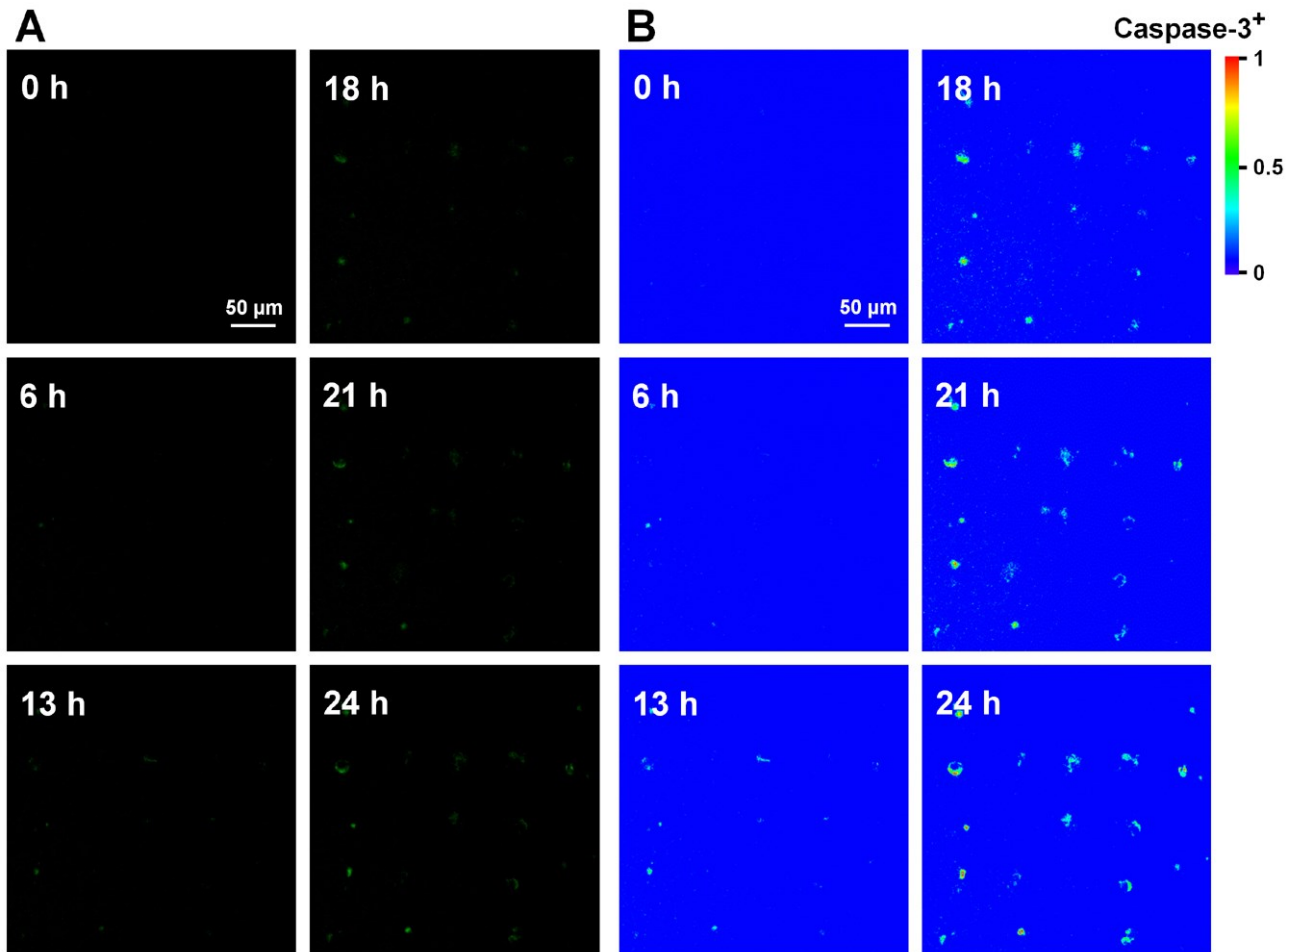

**Fig. S7** Caspase-3 activation of single HeLa cells treated with  $10 \mu\text{g mL}^{-1}$  VLBT at various treatment times (0, 6, 13, 18, 21, and 24 h) in the microwell array chip. Caspase-3<sup>+</sup> cell distribution were visualized based on fluorescence labeling. The pseudo color images (B) correspond to the fluorescence images (A).

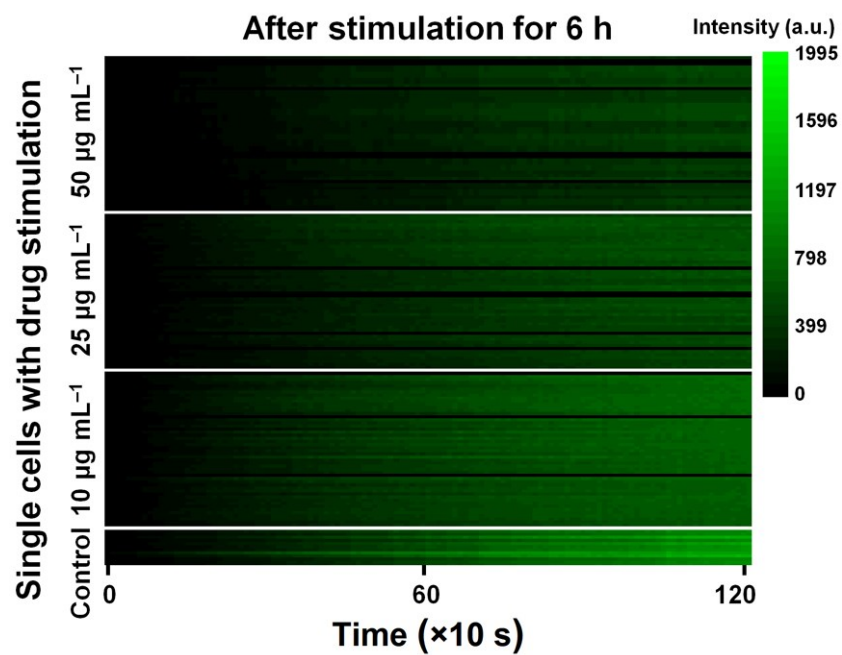

**Fig. S8** Intracellular fluorescence accumulation in single cells after VLBT stimulation with various concentrations for 6 h. The control was set here.
